# Supplementary material for: Stochastic Boolean model of normal and aberrant cell cycles in budding yeast
Source: Springer Nature journal article supplement (doi:10.1038/s41540-024-00452-3), 2024-10-18
Supplement: 41540_2024_452_MOESM1_ESM.pdf [file 41540_2024_452_MOESM1_ESM.pdf]

# Supplementary Information

## Stochastic Boolean Model of Normal and Aberrant Cell Cycles in Budding Yeast

by

Kittisak Taoma, John J. Tyson, Teeraphan Laomettachit & Pavel Kraikivski

**Supplementary Figure 1.** Predicted phenotypes when additional deletions are added to mutant strains that exhibit endocycles.

**Supplementary Figure 2.** Robustness of wild-type cell viability with respect to perturbations of the 65  $\omega_{ij}$  coefficients from the values given in Supplementary Table 2.

**Supplementary Figure 3.** Endocycle period depends linearly on the mean delays ( $\Delta t_{\text{mean}} = k \cdot \theta$ ) of the two slow steps in the negative feedback loop.

**Supplementary Figure 4 & 5.** Simulation of endoreplication cycles in the *clb1-5 $\Delta$*  mutant strain with  $\omega_{\text{Nrm1}} = 1.5$ .

**Supplementary Figure 6.** Simulation of endoreplication cycles in the *clb1-5 $\Delta$*  mutant strain with  $\omega_{\text{Nrm1}} = 0.5$ .

**Supplementary Figure 7.** Simulation of the triple mutants *cdh1 $\Delta$  clb5 $\Delta$  nrm1 $\Delta$*  and *cdh1 $\Delta$  sbf $\Delta$  nrm1 $\Delta$* .

**Supplementary Table 1:** Model variables associated to molecular components of the budding yeast cell-cycle control system in Figure 1. CDK, cyclin-dependent kinase.

**Supplementary Table 2:** Model parameter values.

**Supplementary Table 3:** The logical functions for the Boolean network used to update the 15 proteins of the cell-cycle control system.

**Supplementary Table 4:** Mutant strains simulated by the model.

**Supplementary Table 5:** Summary of time-delay parameters in endoreplication cycles and Cdc14 endocycles.

**Supplementary Table 6.** Comparison of four Boolean models of the budding-yeast cell-cycle engine.

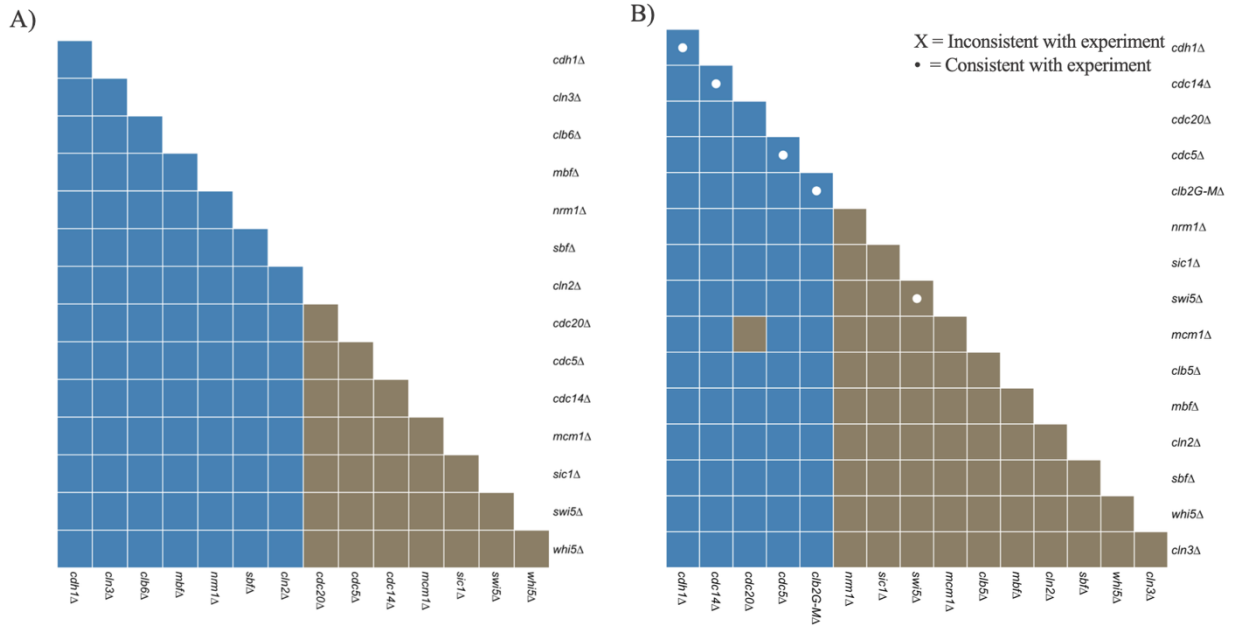

**Supplementary Figure 1.** Predicted phenotypes when additional deletions are added to mutant strains that exhibit endocycles. (A) The endoreplication strain *clb1-5Δ*. (B) The Cdc14 endocycle strain *GAL-CLB2-dbΔ*. (Blue) Mutants that lose endo-oscillations. (Brown) Mutants that retain endo-oscillations. (White dot) Simulations that are consistent with experimental data.

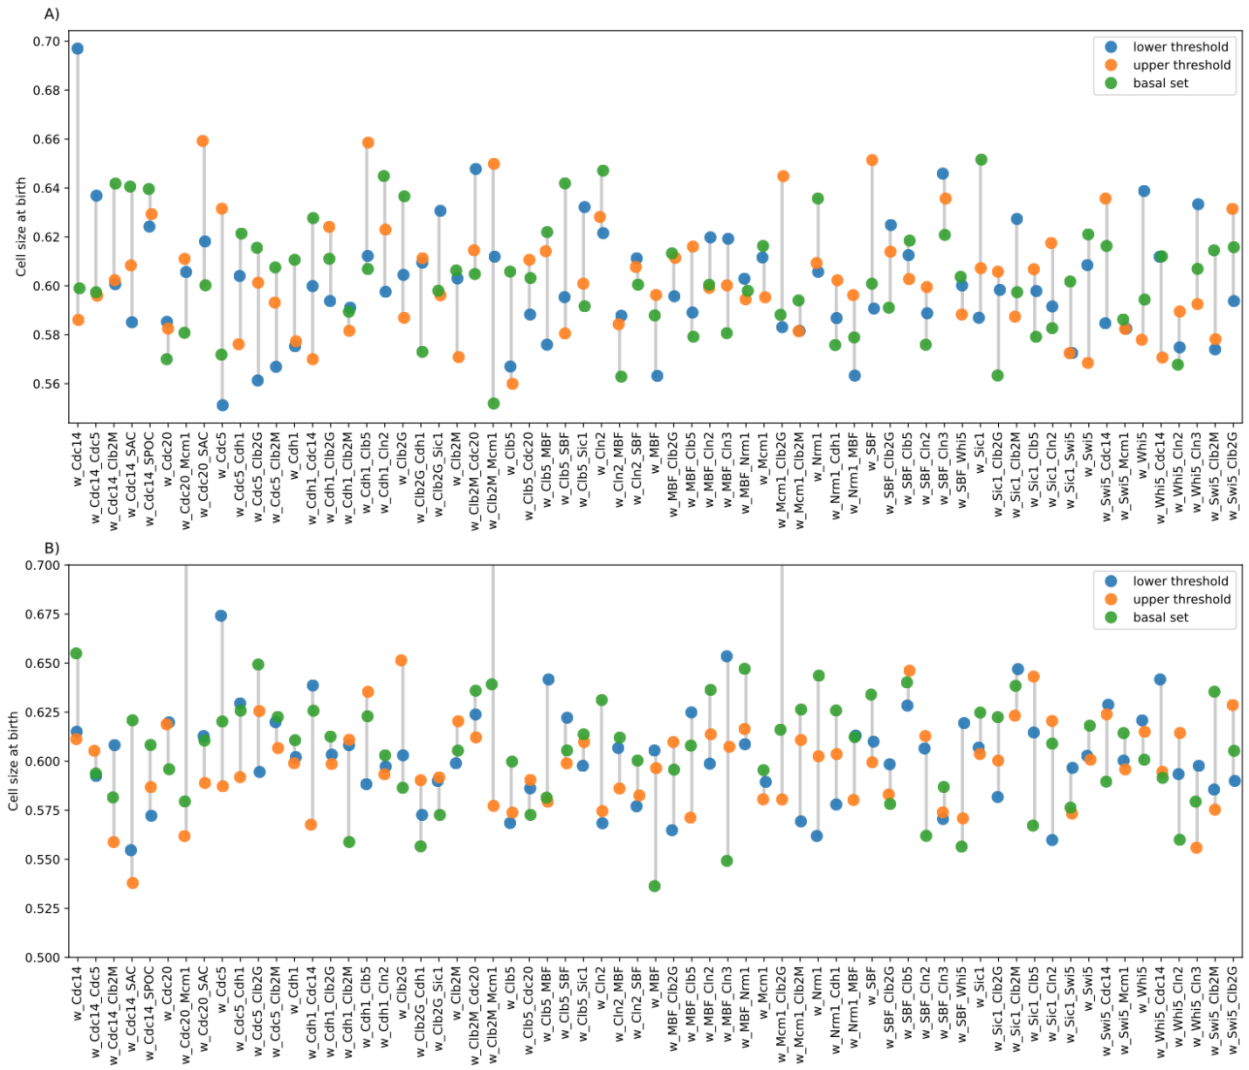

**Supplementary Figure 2.** Robustness of wild-type cell viability with respect to perturbations of the 65  $\omega_{ij}$  coefficients from the values given in Suppl. Table S2. Each parameter value is perturbed separately by a fixed percentage, and the average size of a newborn cell is calculated over the course of 10,000 updates of the Boolean model. (A) Perturb by  $\pm 40\%$ . All simulated cycles are viable. (B) Perturb by  $\pm 50\%$ . The three perturbations that cause cell cycle arrest are reductions:  $\omega_{Cdc20,Mcm1} \rightarrow 0.5$ ,  $\omega_{Clb2M,Mcm1} \rightarrow 0.5$ ,  $\omega_{Mcm1,Clb2G} \rightarrow 0.5$ .

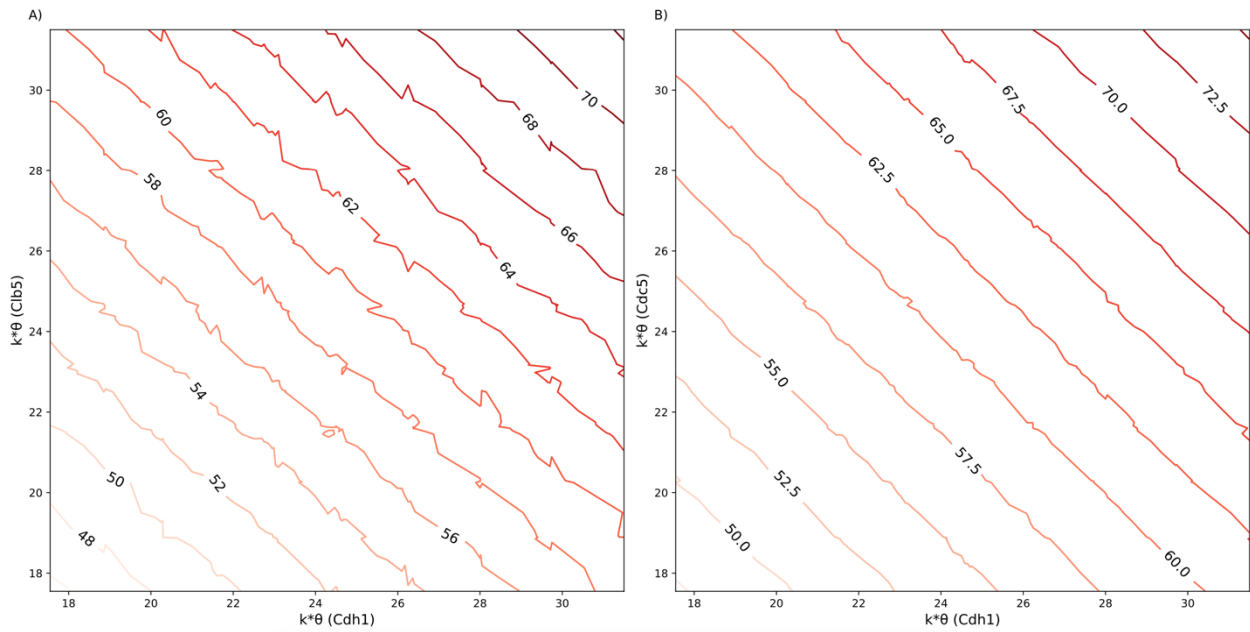

**Supplementary Figure 3.** Endocycle period depends linearly on the mean delays ( $\Delta t_{\text{mean}} = k \cdot \theta$ ) of the two slow steps in the negative feedback loop. (A) Endoreplication period in dependence on delays of Cdh1 inactivation and Clb5 activation. (B) Cdc14 endocycle period in dependence on delays of Cdh1 activation and Cdc5 inactivation.

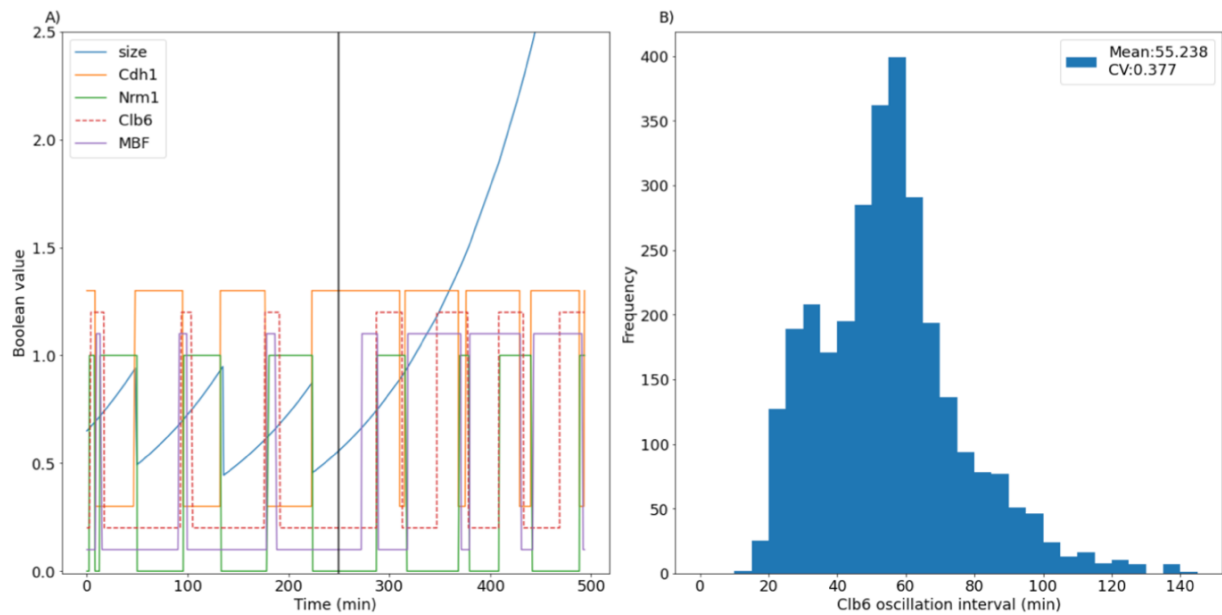

**Supplementary Figure 4.** Simulation of endoreplication cycles in the *clb1-5Δ* mutant strain with  $\omega_{Nrm1} = 1.5$ . (A) Wildtype cell cycles for  $t < 250$  min, and endoreplication cycles for  $t > 250$  min. *Cdh1*, *Clb6* and *MBF* are offset by 0.30, 0.20, and 0.10, respectively. (B) The bimodal distribution of *Clb6* oscillation periods.

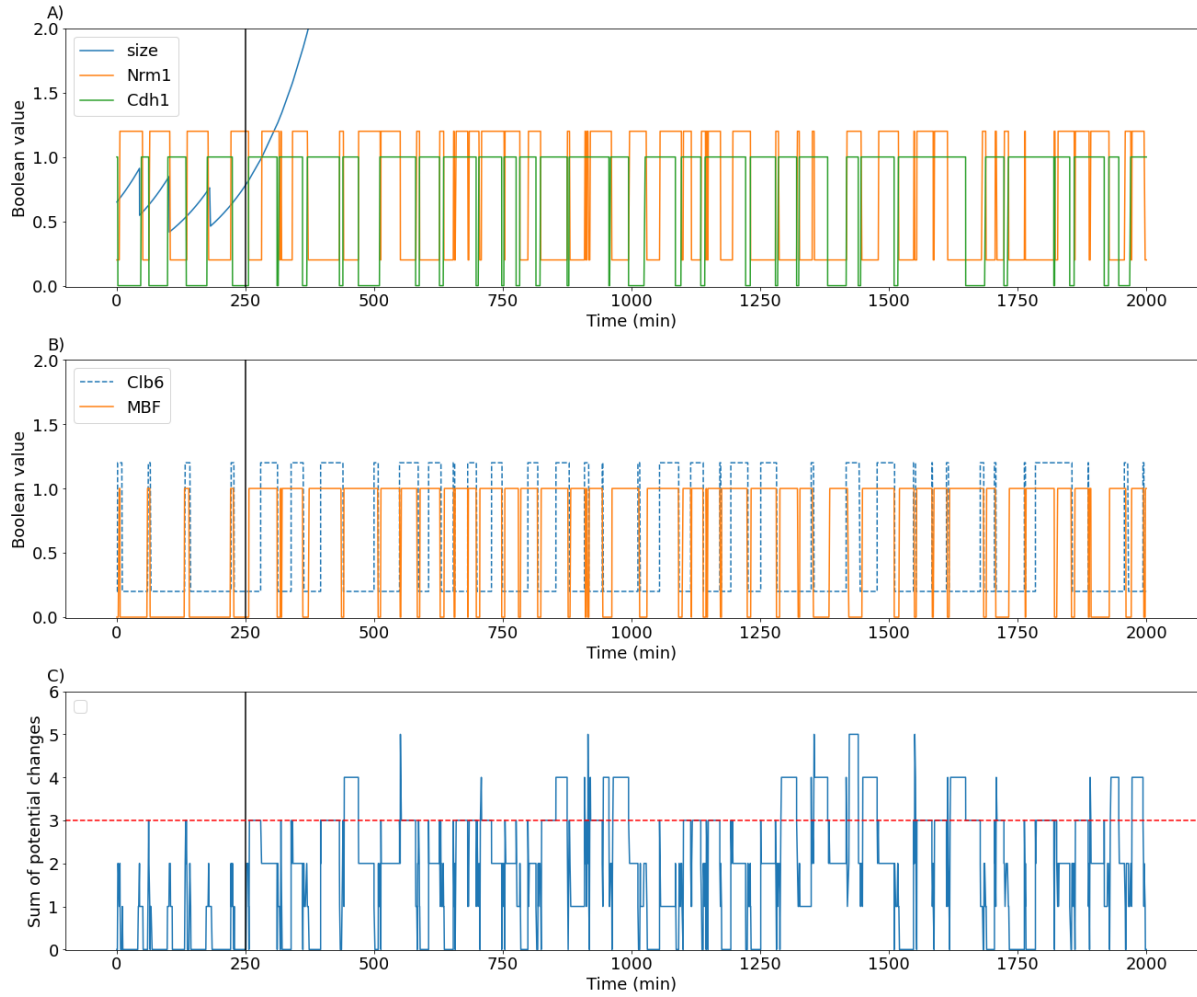

**Supplementary Figure 5.** Simulation of endoreplication cycles in the *clb1-5Δ* mutant strain with  $\omega_{Nrm1} = 1.5$ . (A and B) The four proteins that drive endoreplication cycles. Clb6 and Nrm1 are offset by 0.2. (C) The sum of the potential changes of five proteins (Nrm1, Clb6, Cln2, Cdh1, and Sic1).

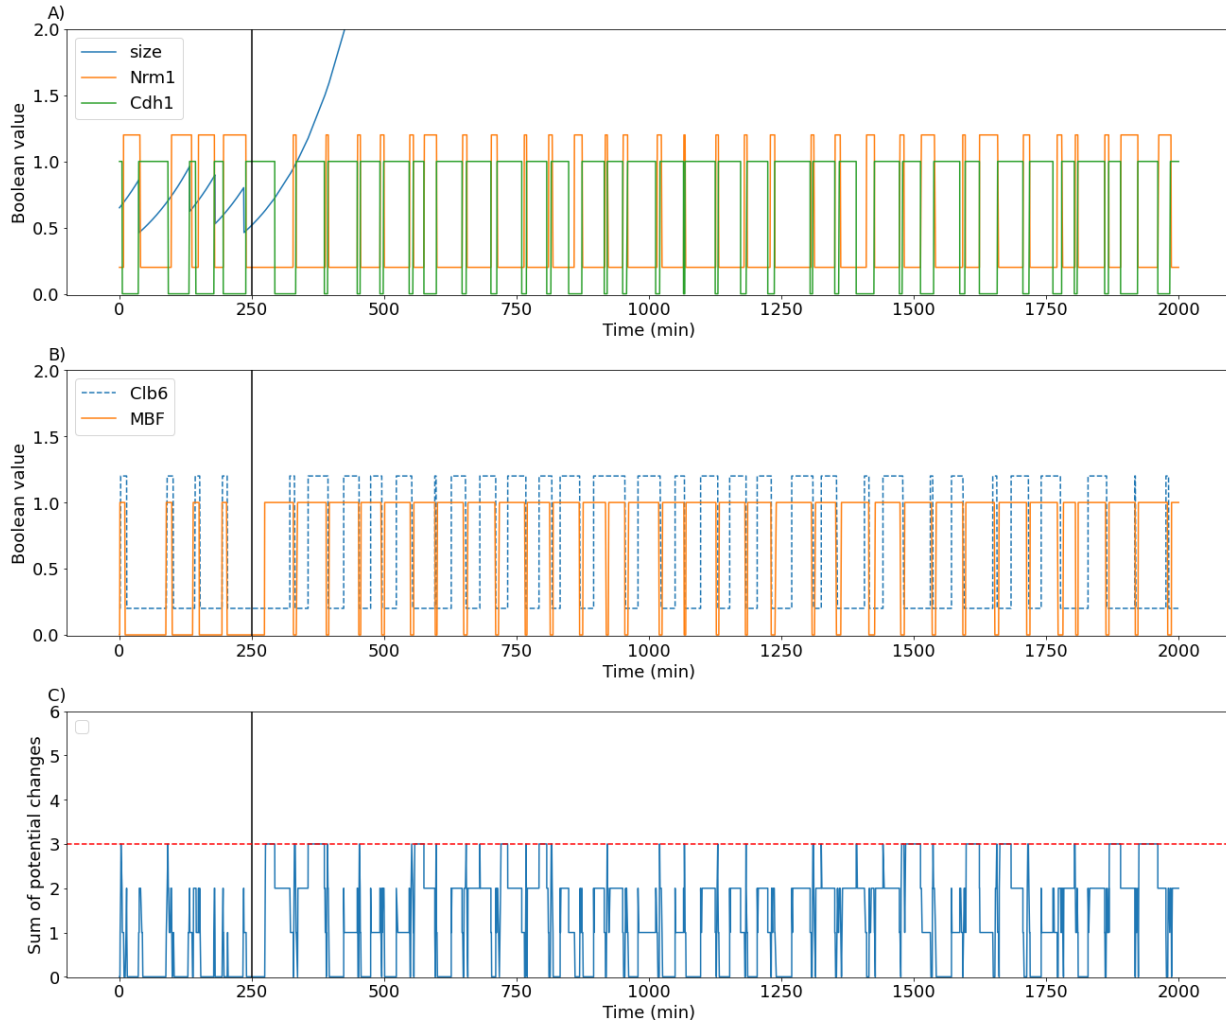

**Supplementary Figure 6.** Simulation of endoreplication cycles in the *clb1-5Δ* mutant strain with  $\omega_{Nrm1} = 0.5$ . (A and B) The four proteins that drive endoreplication cycles. Clb6 and Nrm1 are offset by 0.2. (C) The sum of the potential changes of five proteins (Nrm1, Clb6, Cln2, Cdh1, and Sic1).

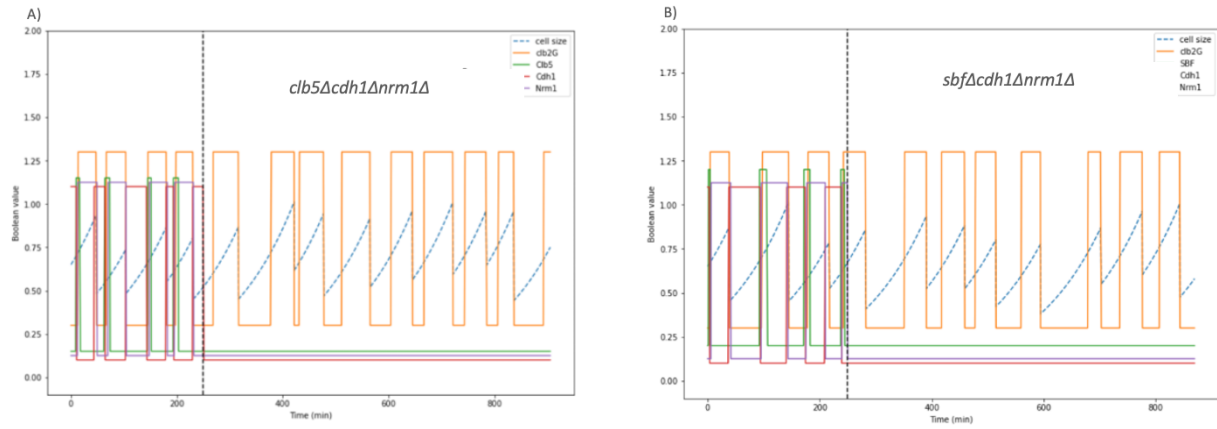

**Supplementary Figure 7.** Simulation of the triple mutants: (A) *cdh1Δ clb5Δ nrm1Δ* and (B) *cdh1Δ sbfΔ nrm1Δ*. The vertical dashed lines indicate the starting time of triple mutant simulation.



**Supplementary Table 1.** Model variables associated to molecular components of the budding yeast cell-cycle control system in Figure 1. CDK, cyclin-dependent kinase.

| <b>Variable</b> | <b>Regulatory Proteins</b> | <b>Functions</b>                                                  |
|-----------------|----------------------------|-------------------------------------------------------------------|
| Whi5            | Whi5                       | Inhibitor of SBF                                                  |
| SBF             | Swi4:Swi6                  | Transcription factor for Cln2 and less for Clb5                   |
| MBF             | Mbp1:Swi6                  | Transcription factor for Clb5 and less for Cln2                   |
| Nrm1            | Nrm1                       | Inhibitor of MBF                                                  |
| Clb5            | Clb5:Cdc28, Clb6:Cdc28     | CDK that initiates DNA replication                                |
| Cln2            | Cln2:Cdc28, Cln1:Cdc28     | CDK that initiates bud emergence                                  |
| Sic1            | Sic1, Cdc6                 | Inhibitor of Clb5 and Clb2G                                       |
| Cdh1            | Cdh1:APC/C                 | Ubiquitin ligase, degradation of Nrm1 and Clb's in G <sub>1</sub> |
| Clb2G           | Clb2:Cdc28, Clb1:Cdc28     | Clb2 activity in G <sub>2</sub> phase                             |
| Clb2M           | Clb2:Cdc28, Clb1:Cdc28     | Enhanced Clb2 activity in M phase                                 |
| Mcm1            | Mcm1                       | Transcription factor for Clb2                                     |
| Cdc5            | Cdc5                       | Polo-like kinase, activator of Cdc14                              |
| Cdc20           | Cdc20:APC/C                | Ubiquitin ligase, degradation of Clb's in anaphase                |
| Cdc14           | Cdc14                      | Phosphatase, activates Swi5 and Cdh1                              |
| Swi5            | Swi5                       | Transcription factor for Sic1                                     |
| <b>Variable</b> | <b>Checkpoint Proteins</b> | <b>Functions</b>                                                  |
| Cln3            | Cln3:Cdc28, Bck2           | CDK that inhibits Whi5 and activates SBF & MBF                    |
| SAC             | Mad1:Mad2                  | Spindle assembly checkpoint (inhibits Cdc20)                      |
| SPOC            | Lte1, Cdc15:Tem1           | Spindle position checkpoint (inhibits Cdc14)                      |
| <b>Variable</b> | <b>Progression</b>         | <b>Functions</b>                                                  |
| Size            | Cell growth                | Inhibits Cln3 until size > S <sub>0</sub>                         |
| SPN             | Spindle assembly progress  | Inhibits SAC until SPN > 1                                        |
| SPO             | Spindle position progress  | Inhibits SPOC until SPO > 1                                       |
| <b>Flag</b>     | <b>Proteins</b>            | <b>Function</b>                                                   |
| ORI             | Mcm2-7, Cdc6               | Origin licensing factor (0 = licensed, 1 = fired)                 |

Supplementary Table 2. Model parameter values.

| A. Parameters defining the Boolean functions |       |                       |       |
|----------------------------------------------|-------|-----------------------|-------|
| Parameter                                    | Value | Parameter             | Value |
| $\omega_{Cdc14}$                             | -0.6  | $\omega_{MBF,Clb2G}$  | 4     |
| $\omega_{Cdc14,Cdc5}$                        | 1.5   | $\omega_{MBF,Clb5}$   | 3     |
| $\omega_{Cdc14,Clb2M}$                       | 1     | $\omega_{MBF,Cln2}$   | 2     |
| $\omega_{Cdc14,SAC}$                         | 1     | $\omega_{MBF,Cln3}$   | 1     |
| $\omega_{Cdc14,SPOC}$                        | 1     | $\omega_{MBF,Nrm1}$   | 5     |
| $\omega_{Cdc20}$                             | -0.5  | $\omega_{Mcm1}$       | -0.5  |
| $\omega_{Cdc20,Mcm1}$                        | 1     | $\omega_{Mcm1,Clb2G}$ | 1     |
| $\omega_{Cdc20,SAC}$                         | 1     | $\omega_{Mcm1,Clb2M}$ | 3     |
| $\omega_{Cdc5}$                              | -0.5  | $\omega_{Nrm1}$       | 0.5   |
| $\omega_{Cdc5,Cdh1}$                         | 3     | $\omega_{Nrm1,Cdh1}$  | 2     |
| $\omega_{Cdc5,Clb2G}$                        | 3     | $\omega_{Nrm1,MBF}$   | 1     |
| $\omega_{Cdc5,Clb2M}$                        | 3     | $\omega_{SBF}$        | -0.5  |
| $\omega_{Cdh1}$                              | 0.5   | $\omega_{SBF,Clb2G}$  | 4     |
| $\omega_{Cdh1,Cdc14}$                        | 3     | $\omega_{SBF,Clb5}$   | 1     |
| $\omega_{Cdh1,Clb2G}$                        | 1     | $\omega_{SBF,Cln2}$   | 1     |
| $\omega_{Cdh1,Clb2M}$                        | 3     | $\omega_{SBF,Cln3}$   | 1     |
| $\omega_{Cdh1,Clb5}$                         | 1     | $\omega_{SBF,Whi5}$   | 3     |
| $\omega_{Cdh1,Cln2}$                         | 0.6   | $\omega_{Sic1}$       | 1.5   |
| $\omega_{Clb2G}$                             | 0.5   | $\omega_{Sic1,Clb2G}$ | 3     |
| $\omega_{Clb2G,Cdh1}$                        | 1     | $\omega_{Sic1,Clb2M}$ | 3     |
| $\omega_{Clb2G,Sic1}$                        | 1     | $\omega_{Sic1,Clb5}$  | 2     |
| $\omega_{Clb2M}$                             | -0.5  | $\omega_{Sic1,Cln2}$  | 2     |
| $\omega_{Clb2M,Cdc20}$                       | 2     | $\omega_{Sic1,Swi5}$  | 2     |
| $\omega_{Clb2M,Mcm1}$                        | 1     | $\omega_{Swi5}$       | -1.5  |
| $\omega_{Clb5}$                              | -0.5  | $\omega_{Swi5,Cdc14}$ | 2     |
| $\omega_{Clb5,Cdc20}$                        | 0.2   | $\omega_{Swi5,Mcm1}$  | 2     |
| $\omega_{Clb5,MBF}$                          | 3     | $\omega_{Swi5,Clb2G}$ | 1     |
| $\omega_{Clb5,SBF}$                          | 0.8   | $\omega_{Swi5,Clb2M}$ | 1     |
| $\omega_{Clb5,Sic1}$                         | 0.25  | $\omega_{Whi5}$       | 0.5   |
| $\omega_{Cln2}$                              | -0.9  | $\omega_{Whi5,Cdc14}$ | 1     |
| $\omega_{Cln2,MBF}$                          | 0.5   | $\omega_{Whi5,Cln2}$  | 1     |
| $\omega_{Cln2,SBF}$                          | 0.8   | $\omega_{Whi5,Cln3}$  | 1     |

|                                   |                          |                             |                          |
|-----------------------------------|--------------------------|-----------------------------|--------------------------|
| $\omega_{\text{MBF}}$             | -0.5                     |                             |                          |
| <b>B. Specific growth rate</b>    |                          |                             |                          |
| $r$ (glucose)                     | 0.0077 min <sup>-1</sup> | $r$ (galactose)             | 0.0046 min <sup>-1</sup> |
| <b>C. Gamma distribution</b>      |                          |                             |                          |
| $k$                               | 3                        | $\theta$                    | 0.3 min <sup>-1</sup>    |
| <b>D. Lognormal distributions</b> |                          |                             |                          |
| $f_{\text{mean}}$ (glucose)       | 0.55                     | $f_{\text{CV}}$ (glucose)   | 0.1                      |
| $f_{\text{mean}}$ (galactose)     | 0.58                     | $f_{\text{CV}}$ (galactose) | 0.1                      |
| $S_{0\_}\text{mean}$              | 0.60                     | $S_{0\_}\text{CV}$          | 0.1                      |
| $SPN_{\text{mean}}$               | 0.07                     | $SPN_{\text{CV}}$           | 0.03                     |
| $SPO_{\text{mean}}$               | 0.07                     | $SPO_{\text{CV}}$           | 0.03                     |

**Supplementary Table 3.** The logical functions for the Boolean network used to update the 15 proteins of the cell-cycle control system.

|    |                                                                                                                                                                                                                                                                                                                                                    |
|----|----------------------------------------------------------------------------------------------------------------------------------------------------------------------------------------------------------------------------------------------------------------------------------------------------------------------------------------------------|
| 1  | $Whi5 = (Cdc14 \text{ AND NOT}(Cln2 \text{ AND } Cln3)) \text{ OR } (NOTCdc14 \text{ AND NOT}(Cln2 \text{ OR } Cln3))$                                                                                                                                                                                                                             |
| 2  | $SBF = (Cln3 \text{ OR } Cln2 \text{ OR } Clb5) \text{ AND NOT}(Whi5 \text{ OR } Clb2G)$                                                                                                                                                                                                                                                           |
| 3  | $MBF = (Clb5 \text{ AND } Cln2 \text{ AND NOTNrm1}) \text{ OR}$<br>$(Clb5 \text{ AND NOTClb2G AND NOTNrm1}) \text{ OR}$<br>$(Cln2 \text{ AND NOTClb2G AND NOTNrm1}) \text{ OR}$<br>$(Cln3 \text{ AND NOTClb2G AND NOTNrm1}) \text{ OR}$<br>$(Clb5 \text{ AND } Cln2 \text{ AND } Cln3 \text{ AND NOTClb2G})$                                       |
| 4  | $Nrm1 = NOTCdh1$                                                                                                                                                                                                                                                                                                                                   |
| 5  | $Clb5 = MBF \text{ OR } (SBF \text{ AND NOTCdc20}) \text{ OR } (SBF \text{ AND NOTSic1})$                                                                                                                                                                                                                                                          |
| 6  | $Cln2 = SBF \text{ AND } MBF$                                                                                                                                                                                                                                                                                                                      |
| 7  | $SIC1 = (Swi5 \text{ AND NOTClb2G AND NOTClb2M AND NOTClb5}) \text{ OR}$<br>$(Swi5 \text{ AND NOTClb2G AND NOTClb2M AND NOTCln2}) \text{ OR}$<br>$(Swi5 \text{ AND NOTClb2G AND NOTClb5 AND NOTCln2}) \text{ OR}$<br>$(Swi5 \text{ AND NOTClb2M AND NOTClb5 AND NOTCln2}) \text{ OR}$<br>$(NOTClb2G \text{ AND NOTClb2M AND NOTClb5 AND NOTCln2})$ |
| 8  | $Cdh1 = (Cdc14 \text{ AND NOTClb2M}) \text{ OR}$<br>$(Cdc14 \text{ AND NOTClb2G AND NOTClb5 AND NOTCln2}) \text{ OR}$<br>$(NOTClb2G \text{ AND NOTClb2M AND NOTClb5 AND NOTCln2})$                                                                                                                                                                 |
| 9  | $Clb2G = NOT(Cdh1 \text{ OR } Sic1)$                                                                                                                                                                                                                                                                                                               |
| 10 | $Clb2M = Mcm1 \text{ AND NOTCdc20}$                                                                                                                                                                                                                                                                                                                |
| 11 | $Mcm1 = Clb2G \text{ OR } Clb2M$                                                                                                                                                                                                                                                                                                                   |
| 12 | $Cdc5 = (NOTCdh1 \text{ AND } (Clb2G \text{ OR } Clb2M)) \text{ OR } (Cdh1 \text{ AND } Clb2G \text{ AND } Clb2M)$                                                                                                                                                                                                                                 |
| 13 | $Cdc20 = Mcm1 \text{ AND NOTSAC}$                                                                                                                                                                                                                                                                                                                  |
| 14 | $Cdc14 = Cdc5 \text{ AND NOT}(Clb2M \text{ OR } SAC \text{ OR } SPOC)$                                                                                                                                                                                                                                                                             |
| 15 | $Swi5 = (Cdc14 \text{ AND } Mcm1) \text{ OR } (Cdc14 \text{ AND NOTClb2G AND NOTClb2M}) \text{ OR } (Mcm1 \text{ AND NOTClb2G AND NOTClb2M})$                                                                                                                                                                                                      |

**Supplementary Table 4.** Mutant strains simulated by the model. \* indicates inconsistency between simulated and observed phenotypes.

| Item | Mutant           | Modified Parameter<br>(i any regulated proteins) | Phenotype                                                                                                                |                                                                              |                                                            |
|------|------------------|--------------------------------------------------|--------------------------------------------------------------------------------------------------------------------------|------------------------------------------------------------------------------|------------------------------------------------------------|
|      |                  |                                                  | Experiment (Reference)                                                                                                   | ODE Model                                                                    | Simulation                                                 |
| 1    | WT in glucose    | $r = 0.0077$                                     | viable (size = 1.0)<br>(PMID: 27187804)                                                                                  | viable (size = 1.0)<br>(PMID: 27187804)                                      | viable<br>(size = 1.0)                                     |
| 2    | WT in galactose  | $r = 0.0046$<br>$f_{\text{mean}} = 0.58$         | viable (size = 0.86)<br>(PMID: 27187804)                                                                                 | viable (size = 0.73)<br>(PMID: 27187804)                                     | viable<br>(size = 0.84)                                    |
| 3    | <i>whi5Δ</i>     | $\omega_{\text{Whi5}} = -10$                     | viable<br>(PMID: 12089449)                                                                                               | viable<br>(PMID: 28725464)                                                   | viable                                                     |
| 4    | <i>sic1Δ</i>     | $\omega_{\text{Sic1}} = -10$                     | viable<br>(PMID: 8614808)                                                                                                | viable<br>(PMID: 15169868)                                                   | viable                                                     |
| 5    | <i>swi4Δ</i>     | $\omega_{\text{SBF}} = -10$                      | viable<br>(PMID: 12024050)                                                                                               | viable<br>(PMID: 28725464)                                                   | viable                                                     |
| 6    | <i>mbp1Δ</i>     | $\omega_{\text{MBF}} = -10$                      | viable<br>(PMID: 8372350)                                                                                                | viable<br>(PMID: 28725464)                                                   | viable                                                     |
| 7    | <i>cdc5Δ</i>     | $\omega_{\text{Cdc5}} = -10$                     | Invisible, no Cdc14 release<br>(PMID: 11832211)                                                                          | Invisible,<br>no Cdc14 release<br>(PMID: 28725464)                           | Invisible<br>no Cdc14 release                              |
| 8    | <i>mcm1Δ</i>     | $\omega_{\text{Mcm1}} = -10$                     | Invisible<br>( <a href="https://www.yeastgenome.org/locus/S000004646">https://www.yeastgenome.org/locus/S000004646</a> ) | Invisible                                                                    | Invisible                                                  |
| 9    | <i>cdc20Δ</i>    | $\omega_{\text{Cdc20}} = -10$                    | metaphase arrest<br>(Cdc20 = 0 & Clb2 = 1)<br>(PMID: 9501986)                                                            | Invisible<br>(PMID: 15169868 &<br>PMID: 28725464 &<br>PMID: 27187804)        | metaphase arrest<br>(Cdc20 = 0 & Clb2G<br>= Clb2M = 1)     |
| 10   | <i>cdc14Δ</i>    | $\omega_{\text{Cdc14}} = -10$                    | Lethal-telophase arrest<br>(cdc20 = 1 & clb2 = 0)<br>(PMID: 9885559)                                                     | telophase arrest<br>(cdc20 = 1 & clb2G<br>= 1 & clb2M = 0)<br>PMID: 15169868 | telophase arrest<br>(Cdc20 = 1 & Clb2G<br>= 1 & Clb2M = 0) |
| 11   | <i>swi5Δ</i>     | $\omega_{\text{Swi5}} = -10$                     | viable (PMID:12140549)                                                                                                   | viable<br>(PMID: 27187804)                                                   | viable                                                     |
| 12   | <i>cdh1Δ</i>     | $\omega_{\text{Cdh1}} = -10$                     | viable<br>but smaller than wild type<br>(PMID: 9288748)                                                                  | viable<br>(PMID: 27187804 &<br>PMID: 15169868)                               | viable                                                     |
| 13   | <i>nrm1Δ</i>     | $\omega_{\text{Nrm1}} = -10$                     | viable (PMID:12489128)                                                                                                   | Not included                                                                 | viable                                                     |
| 14   | WT in Nocodazole | SAC = 1                                          | metaphase arrest<br>(PMID: 10329618)                                                                                     | metaphase arrest<br>(PMID: 27187804)                                         | metaphase arrest<br>(Cdc20 = 0 & Clb2G<br>= Clb2M = 1)     |

|     |                                          |                                                             |                                                       |                                                                           |                                                                           |
|-----|------------------------------------------|-------------------------------------------------------------|-------------------------------------------------------|---------------------------------------------------------------------------|---------------------------------------------------------------------------|
| 15  | <i>GAL-SIC1</i>                          | $\gamma_{SIC1} = 0.4$<br>$r = 0.0046$<br>$f_{mean} = 0.58$  | viable<br>(PMID: 8164683)                             | viable<br>(PMID: 15169868)                                                | viable                                                                    |
| 16  | <i>GAL-CLN3</i>                          | $\gamma_{CLN3} = 0.5$<br>$r = 0.0046$<br>$f_{mean} = 0.58$  | viable<br>(PMID: 1316273)                             | viable<br>(PMID: 27187804)                                                | viable                                                                    |
| 17  | <i>GAL-CLB5</i>                          | $\gamma_{CLB5} = 0.5$<br>$r = 0.0046$<br>$f_{mean} = 0.58$  | viable<br>(PMID: 8319908)                             | viable<br>(PMID: 15169868)                                                | viable                                                                    |
| 18  | <i>GAL-CDC5</i>                          | $\gamma_{CDC5} = 0.5$<br>$r = 0.0046$<br>$f_{mean} = 0.58$  | viable<br>(PMID: 16455487)                            | viable<br>(PMID: 28725464)                                                | viable                                                                    |
| 19  | <i>GAL-CLB2</i>                          | $\gamma_{CLB2} = 0.1$<br>$r = 0.0046$<br>$f_{mean} = 0.58$  | viable<br>(PMID: 27187804)                            | viable<br>(PMID: 27187804)                                                | viable                                                                    |
| 20  | <i>GAL-CDC20</i>                         | $\gamma_{CDC20} = 0.5$<br>$r = 0.0046$<br>$f_{mean} = 0.58$ | Inviabile<br>(PMID: 9482731)                          | inviabile-mitotic<br>catastrophe<br>(PMID: 28725464)                      | inviabile-mitotic<br>catastrophe<br>(Cdc20 = 1 before<br>SPN is finished) |
| 21* | <i>GAL-CDC14</i>                         | $\gamma_{CDC14} = 0.5$<br>$r = 0.0046$<br>$f_{mean} = 0.58$ | Inviabile-G <sub>1</sub> arrest<br>(PMID: 27187804)   | inviabile-G <sub>1</sub> arrest<br>(PMID: 27187804)                       | Inviabile-<br>S arrest                                                    |
| 22  | <i>cln1Δ cln2Δ</i>                       | $\omega_{CLN2} = -10$                                       | viable<br>(PMID: 7588610)                             | viable<br>(PMID: 28725464)                                                | viable                                                                    |
| 23  | <i>cln3Δ bck2Δ</i>                       | $\omega_{CLN3} = -10$                                       | inviabile (G <sub>1</sub> arrest)<br>(PMID: 10545447) | inviabile (G <sub>1</sub> arrest)<br>(PMID: 15169868 &<br>PMID: 28725464) | inviabile<br>(G <sub>1</sub> arrest: Sic1 = 1,<br>ORI = 0)                |
| 24  | <i>clb5Δ clb6Δ</i>                       | $\omega_{CLB5} = -10$                                       | viable (PMID: 8319908)                                | viable<br>(PMID: 28725464)                                                | viable                                                                    |
| 25  | <i>clb1Δ clb2Δ</i>                       | $\omega_{CLB2G} = -10$<br>$\omega_{CLB2M} = -10$            | inviabile (G <sub>2</sub> arrest)<br>(PMID: 1849457)  | inviabile (G <sub>2</sub> arrest)<br>(PMID: 28725464)                     | inviabile (G <sub>2</sub> arrest)<br>(Clb2G = Clb2M = 0)                  |
| 26* | <i>cln3Δ bck2Δ</i><br><i>whi5Δ</i>       | $\omega_{CLN3} = -10$<br>$\omega_{WHI5} = -10$              | viable<br>(PMID: 15210110)                            | viable<br>(PMID: 28725464)                                                | inviabile                                                                 |
| 27  | <i>cln3Δ bck2Δ</i><br><i>sic1Δ</i>       | $\omega_{CLN3} = -10$<br>$\omega_{SIC1} = -10$              | inviabile<br>(PMID: 10545447)                         | inviabile (G <sub>1</sub> arrest)<br>(PMID: 28725464)                     | Inviabile<br>(G <sub>1</sub> arrest: Cdh1 = 1,<br>ORI = 0)                |
| 28  | <i>cln1Δ cln2Δ</i><br><i>cdh1Δ</i>       | $\omega_{CDH1} = -10$<br>$\omega_{CLN2} = -10$              | viable<br>(PMID: 11809822)                            | viable<br>(PMID: 28725464)                                                | viable                                                                    |
| 29  | <i>cln1Δ cln2Δ</i><br><i>clb5Δ clb6Δ</i> | $\omega_{CLN2} = -10$<br>$\omega_{CLB5} = -10$              | inviabile<br>(PMID: 7588610)                          | inviabile (G <sub>1</sub> arrest)<br>(PMID: 15169868)                     | inviabile (G <sub>1</sub> arrest)<br>(Sic1 = Cdh1 = 1)                    |

|     |                                   |                                                                                                              |                                                        |                                                    |                                                      |
|-----|-----------------------------------|--------------------------------------------------------------------------------------------------------------|--------------------------------------------------------|----------------------------------------------------|------------------------------------------------------|
| 30  | <i>cln1Δ cln2Δ sic1Δ</i>          | $\omega_{Cln2} = -10$<br>$\omega_{Sic1} = -10$                                                               | viable (PMID: 7588610)                                 | viable (PMID: 15169868)                            | viable                                               |
| 31  | <i>swi4Δ swi6Δ</i>                | $\omega_{SBF} = -10$<br>$\omega_{MBF} = -10$                                                                 | Inviabile (PMID: 8372350)                              | Inviabile (G <sub>1</sub> arrest) (PMID: 28725464) | Inviabile                                            |
| 32  | <i>swi5Δ cdh1Δ</i>                | $\omega_{Swi5} = -10$<br>$\omega_{Cdh1} = -10$                                                               | Inviabile (Arrest as binucleate cell) (PMID: 12960422) | Inviabile (telophase arrest) (PMID: 15169868)      | Inviabile (telophase arrest) (Clb2G = 1 and ORI = 1) |
| 33  | <i>cdc20Δ clb5Δ clb6Δ</i>         | $\omega_{Cdc20} = -10$<br>$\omega_{Clb5} = -10$                                                              | Inviabile (Metaphase arrest) (PMID: 10647015)          | Inviabile (Metaphase arrest) (PMID: 15169868)      | Metaphase arrest (Cdc20 = 0 & Clb2G = Clb2M = 1)     |
| 34  | <i>sic1Δ cdh1Δ</i>                | $\omega_{Cdh1} = -10$<br>$\omega_{Sic1} = -10$                                                               | Inviabile (PMID: 9288748)                              | Inviabile (PMID: 27187804)                         | inviabile                                            |
| 35  | <i>clb1Δ clb2Δ clb5Δ clb6Δ</i>    | $\omega_{Clb5} = -10$<br>$\omega_{Clb2G} = -10$<br>$\omega_{Clb2M} = -10$                                    | Inviabile (G <sub>1</sub> arrest) (PMID: 27187804)     | Inviabile (G <sub>1</sub> arrest) (PMID: 27187804) | Inviabile (G <sub>1</sub> arrest: Sic1 = Cdh1 = 1)   |
| 36* | <i>GAL-SIC1 cln1Δ cln2Δ</i>       | $\gamma_{SIC1} = 0.4$<br>$\omega_{Cln2} = -10$<br>$r = 0.0046$<br>$f_{mean} = 0.58$                          | Inviabile (PMID: 11809822)                             | Inviabile G <sub>1</sub> arrest) (PMID: 15169868)  | viable                                               |
| 37  | <i>GAL-SIC1 cln1Δ cln2Δ cdh1Δ</i> | $\gamma_{SIC1} = 0.4$<br>$\omega_{Cln2} = -10$<br>$\omega_{Cdh1} = -10$<br>$r = 0.0046$<br>$f_{mean} = 0.58$ | Inviabile (PMID: 11809822)                             | Inviabile (G <sub>1</sub> arrest) (PMID: 15169868) | inviabile                                            |
| 38* | <i>GAL-SIC1 swi5Δ cdh1Δ</i>       | $\gamma_{SIC1} = 0.4$<br>$\omega_{Cdh1} = -10$<br>$\omega_{Swi5} = -10$<br>$r = 0.0046$<br>$f_{mean} = 0.58$ | viable (rescued) (PMID: 27187804)                      | viable (PMID: 15169868)                            | inviabile                                            |
| 39* | <i>GAL-CLB5 sic1Δ</i>             | $\gamma_{CLB5} = 0.5$<br>$\omega_{Sic1} = -10$<br>$r = 0.0046$<br>$f_{mean} = 0.58$                          | Inviabile (PMID: 27187804)                             | Inviabile (ORI is not licensed) (PMID: 15169868)   | viable (ORI is licensed)                             |
| 40  | <i>GAL-CLB5 cdh1Δ</i>             | $\gamma_{CLB5} = 0.5$<br>$\omega_{Cdh1} = -10$<br>$r = 0.0046$<br>$f_{mean} = 0.58$                          | Inviabile for unknown cause (PMID: 27187804)           | viable (PMID: 15169868)                            | inviabile                                            |
| 41* | <i>GALL-CDC20 sic1Δ cdh1Δ</i>     | $\gamma_{CDC20} = 2$<br>$\omega_{Cdh1} = -10$<br>$\omega_{Sic1} = -10$<br>$r = 0.0046$<br>$f_{mean} = 0.58$  | viable (PMID: 27187804)                                | viable (PMID: 15169868)                            | inviabile                                            |

|     |                                      |                                                                                                                                    |                                                  |                                                                               |                                                 |
|-----|--------------------------------------|------------------------------------------------------------------------------------------------------------------------------------|--------------------------------------------------|-------------------------------------------------------------------------------|-------------------------------------------------|
| 42  | <i>GAL-CLB2</i><br><i>cdh1Δ</i>      | $\gamma_{CLB2} = 0.1$<br>$\omega_{Cdh1} = -10$<br>$r = 0.0046$<br>$f_{mean} = 0.58$                                                | Inviabile<br>(PMID: 27187804)                    | Inviabile<br>(telophase arrest)<br>(PMID: 15169868)                           | inviabile                                       |
| 43* | <i>GAL-CLB2</i><br><i>sic1Δ</i>      | $\gamma_{CLB2} = 0.1$<br>$\omega_{Sic1} = -10$<br>$r = 0.0046$<br>$f_{mean} = 0.58$                                                | Inviabile (telophase arrest)<br>(PMID: 27187804) | Inviabile<br>(PMID: 15169868)                                                 | viable                                          |
| 44* | <i>GAL-CLB2</i><br><i>swi5Δ</i>      | $\gamma_{CLB2} = 0.1$<br>$\omega_{Swi5} = -10$<br>$r = 0.0046$<br>$f_{mean} = 0.58$                                                | Inviabile<br>(PMID: 27187804)                    | Inviabile (telophase arrest)<br>(PMID: 15169868)                              | viable                                          |
| 45  | <i>swi4Δ swi6Δ</i><br><i>sic1Δ</i>   | $\omega_{SBF} = -10$<br>$\omega_{MBF} = -10$<br>$\omega_{Sic1} = -10$                                                              | Inviabile<br>(PMID: 10545447)                    | inviabile (G <sub>1</sub> arrest)<br>(PMID: 28725464)                         | inviabile (G <sub>1</sub> arrest)<br>(Cdh1 = 1) |
| 46  | <i>clb1-5Δ</i>                       | $\omega_{Clb2G} = -10$<br>$\omega_{Clb2M} = -10$<br>$\omega_{Clb5} = -1.1$<br>$\omega_{i,Clb5} \rightarrow$<br>$\omega_{i,Clb5}/8$ | clb6 oscillation<br>(PMID: 22306294)             | clb6 oscillation<br>(PMID: 35504285)                                          | Clb6 oscillation                                |
| 47  | <i>GAL-CLB2-</i><br><i>dbΔ</i>       | $\gamma_{CLB2ND} = 0.5$<br>$r = 0.0046$<br>$f_{mean} = 0.58$                                                                       | Cdc14 oscillation<br>(PMID: 20660629)            | Cdc14 oscillation<br>(PMID: 28725464 &<br>PMID: 35504285 &<br>PMID: 27187804) | Cdc14 oscillation                               |
| 48  | <i>GAL-CLB2-</i><br><i>dbΔ sic1Δ</i> | $\gamma_{CLB2ND} = 0.5$<br>$\omega_{Sic1} = -10$<br>$r = 0.0046$<br>$f_{mean} = 0.58$                                              | Cdc14 oscillation<br>(PMID: 20660629)            | Cdc14 oscillation<br>(PMID: 28725464)                                         | Cdc14 oscillation                               |
| 49  | <i>GAL-CLB2-</i><br><i>dbΔ swi5Δ</i> | $\gamma_{CLB2ND} = 0.5$<br>$\omega_{Swi5} = -10$<br>$r = 0.0046$<br>$f_{mean} = 0.58$                                              | Cdc14 oscillation<br>(PMID: 20660629)            | Cdc14 oscillation<br>(PMID: 28725464)                                         | Cdc14 oscillation                               |
| 50  | <i>GAL-CLB2-</i><br><i>dbΔ cdc5Δ</i> | $\gamma_{CLB2ND} = 0.5$<br>$\omega_{Cdc5} = -10$<br>$r = 0.0046$<br>$f_{mean} = 0.58$                                              | No cdc14 oscillation<br>(PMID: 20660629)         | Telophase arrest,<br>cdc14 is not<br>released<br>(PMID: 28725464)             | Telophase arrest<br>(Cdc14 = 0)                 |



**Supplementary Table 5.** Summary of time-delay parameters in endoreplication cycles and Cdc14 endocycles.

| Protein with time delay | Description                                                                                           | Gamma distribution (Mean $\pm$ CV) |                 |
|-------------------------|-------------------------------------------------------------------------------------------------------|------------------------------------|-----------------|
|                         |                                                                                                       | endoreplication                    | Cdc14 endocycle |
| Cdc5                    | Delay for Cdc5 inactivation due to high Clb2G&M from GAL promotor                                     | 0.9 $\pm$ 0.58                     | 22.5 $\pm$ 0.25 |
| Cdh1                    | Delay for Cdh1 activation due to high Clb2G&M level from GAL promotor                                 | 0.9 $\pm$ 0.57                     | 22.5 $\pm$ 0.25 |
| Cdh1                    | Delay for Cdh1 inactivation when Clb5 is deleted                                                      | 22.5 $\pm$ 0.25                    | 0.9 $\pm$ 0.58  |
| Clb6                    | Delay for Clb6 activation because Clb6 has a lower transcription rate induced by MBF compared to Clb5 | 22.5 $\pm$ 0.25                    | 0.9 $\pm$ 0.58  |

**Supplementary Table 6.** Comparison of four Boolean models of the budding-yeast cell-cycle engine. Using red and blue font indicates comparable elements of different models.

|                          | Li et al. (2004)                                                               | Irons (2009)                                                                         | Faure et al. (2009)<br>Core Model (Fig. 1)                                                                            | Kittisak et al. (present work)                                                                                                                        |
|--------------------------|--------------------------------------------------------------------------------|--------------------------------------------------------------------------------------|-----------------------------------------------------------------------------------------------------------------------|-------------------------------------------------------------------------------------------------------------------------------------------------------|
| Components: Proteins     | Cdh1, Sic1/Cdc6, Cln3/Bck2, SBF/MBF, Cln1/2, Clb5/6, Mcm1, Swi5, Clb1/2, Cdc20 | Add: Yhp1/Yox1, Cdc14<br>FEAR<br>MEN                                                 | Add: Cdc14<br>Net1, Mad2, Pds1, Esp1<br>Cdc55, Bub2, Lte1, Cdc15                                                      | Add: Whi5, Nrm1, Cdc5, Clb2M, Cdc14<br>SAC<br>SPOC                                                                                                    |
| Components: Events       |                                                                                | S, B, M, CD                                                                          | ORI, BUD, SPN, CYTOKINESIS                                                                                            | Size, ORI, SPN, SPO, CD                                                                                                                               |
| Boolean Functions        | Heav( $W_i(\dots)$ )                                                           | Logical Functions<br>'Dummy' variables to delay some updates                         | Logical Functions<br>Clb2, Clb5, Cdc20 are multi-state variables                                                      | Heav( $W_i(\dots)$ )                                                                                                                                  |
| Time                     | Discrete steps                                                                 | Discrete steps                                                                       | Discrete steps                                                                                                        | Real variable                                                                                                                                         |
| Cell Size                | Absent                                                                         | Absent                                                                               | MASS (Boolean variable)                                                                                               | Size(t), real variable                                                                                                                                |
| Updating Method          | Synchronous (deterministic)                                                    | Synchronous (deterministic)                                                          | Synchronous (deterministic)<br>Priorities for CYTOK & MASS                                                            | Asynchronous/random<br>Stochastic $\Delta t$ & cell division                                                                                          |
| Cell Cycle               | 13 states from Start to a stationary, early $G_1$ state                        | 19 state cycle, driven by NFL:<br>Cln3 $\rightarrow$ SBF $\rightarrow$ Yhp1 --  Cln3 | 22 state cycle, activity of MASS in $G_1$ drives Start transition                                                     | Repetitive, noisy cycles driven by growth and CD                                                                                                      |
| Mutants                  | Not simulated                                                                  | Simulated 13 deletion strains and 4 checkpoints                                      | Simulated 135 mutant strains by adjusting the logical functions in accordance with the genetics of each mutant strain | Simulated deletion and overproduction strains, endoreplication and Cdc14-endocycle strains; and predicted phenotypes of 105 'double-deletion' strains |
| Cell-cycle Distributions | Not applicable                                                                 | Not applicable                                                                       | Not applicable                                                                                                        | Good fit to observed cell size and cycle-time distributions and to correlations between size at birth and $G_1$ duration                              |
